# Supplementary material
Source: Springer Nature journal article supplement (https://www.springermedizin.de/resource/supplementary/13048_2013_200_MOESM7_ESM.pdf/9665124)

a)

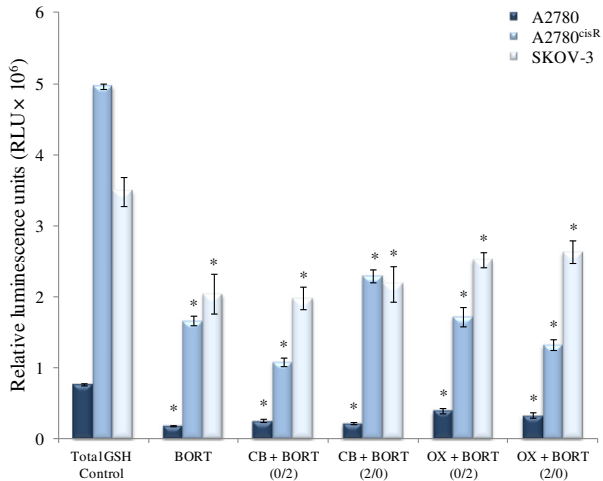

b)

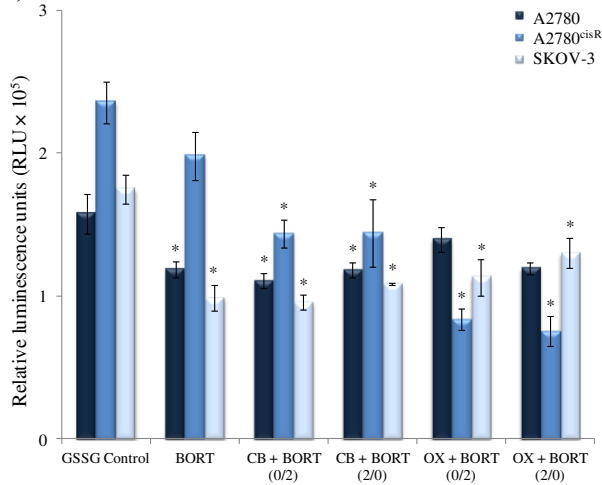

Supplement: MOESM7 [file 9665124]
